# Supplementary material for: Transcriptome Profiling of Buffalograss Challenged with the Leaf Spot Pathogen Curvularia inaequalis
Source: Front Plant Sci. 2016 May 25;7:715. doi: 10.3389/fpls.2016.00715 (PMC4879344; doi:10.3389/fpls.2016.00715)
Supplement: Supplementary file 2 [file Table_2.XLSX]

## Sheet: Supp Table 2 
	SUPPLEMENTARY TABLE 2. Defence related genes of buffalograss and their sequence length, seuqence description, and gene ontologies identified by annotation step of Blast2GO analysis
	Sequence Name	Length (bp)	Sequence Description	GO-Group	GO-ID	Term
	Bodac2015c000375	1550	protein lyk5-like	P	GO:0006468	protein phosphorylation
	Bodac2015c000375		protein lyk5-like	P	GO:0016998	cell wall macromolecule catabolic process
	Bodac2015c000375		protein lyk5-like	F	GO:0004672	protein kinase activity
	Bodac2015c000375		protein lyk5-like	P	GO:0045087	innate immune response
	Bodac2015c000375		protein lyk5-like	F	GO:0008061	chitin binding
	Bodac2015c000375		protein lyk5-like	C	GO:0016023	cytoplasmic membrane-bounded vesicle
	Bodac2015c000375		protein lyk5-like	F	GO:0005524	ATP binding
	Bodac2015c000375		protein lyk5-like	C	GO:0005886	plasma membrane
	Bodac2015c080259	258	disease resistance protein rpm1-like isoform x1	P	GO:0006952	defense response
	Bodac2015c080259		disease resistance protein rpm1-like isoform x1	F	GO:0043531	ADP binding
	Bodac2015c088233	207	disease resistance rpp13-like protein 3-like	P	GO:0006952	defense response
	Bodac2015c088233		disease resistance rpp13-like protein 3-like	F	GO:0043531	ADP binding
	Bodac2015c095545	276	disease resistance protein rpm1-like isoform x1	P	GO:0006952	defense response
	Bodac2015c095545		disease resistance protein rpm1-like isoform x1	F	GO:0043531	ADP binding
	Bodac2015c100000	563	nbs-lrr class disease resistance protein	P	GO:0006915	apoptotic process
	Bodac2015c100000		nb-arc domain containing expressed	P	GO:0006952	defense response
	Bodac2015c100000		nb-arc domain containing expressed	F	GO:0043531	ADP binding
	Bodac2015c100000		nb-arc domain containing expressed	F	GO:0005524	ATP binding
	Bodac2015c126512	223	malate dehydrogenase	F	GO:0005507	copper ion binding
	Bodac2015c126512		malate dehydrogenase	C	GO:0005618	cell wall
	Bodac2015c126512		malate dehydrogenase	F	GO:0030060	L-malate dehydrogenase activity
	Bodac2015c126512		malate dehydrogenase	C	GO:0005739	mitochondrion
	Bodac2015c126512		malate dehydrogenase	P	GO:0009651	response to salt stress
	Bodac2015c126512		malate dehydrogenase	P	GO:0042742	defense response to bacterium
	Bodac2015c126512		malate dehydrogenase	P	GO:0009409	response to cold
	Bodac2015c126512		malate dehydrogenase	P	GO:0006108	malate metabolic process
	Bodac2015c126512		malate dehydrogenase	P	GO:0006099	tricarboxylic acid cycle
	Bodac2015c126512		malate dehydrogenase	P	GO:0044262	cellular carbohydrate metabolic process
	Bodac2015c126512		malate dehydrogenase	C	GO:0016023	cytoplasmic membrane-bounded vesicle
	Bodac2015c126512		malate dehydrogenase	C	GO:0009507	chloroplast
	Bodac2015c126512		malate dehydrogenase	P	GO:0046686	response to cadmium ion
	Bodac2015c126512		malate dehydrogenase	C	GO:0016020	membrane
	Bodac2015c126512		malate dehydrogenase	C	GO:0048046	apoplast
	Bodac2015c127986	226	disease resistance protein rga2	P	GO:0006952	defense response
	Bodac2015c127986		disease resistance protein rga2	F	GO:0043531	ADP binding
	Bodac2015c130171	892	pathogenesis-related protein 5	P	GO:0050832	defense response to fungus
	Bodac2015c130171		pathogenesis-related protein 5	C	GO:0016023	cytoplasmic membrane-bounded vesicle
	Bodac2015c130171		pathogenesis-related protein 5	P	GO:0031640	killing of cells of other organism
	Bodac2015c130179	955	snrk sapk family protein kinase	P	GO:0006468	protein phosphorylation
	Bodac2015c130179		snrk sapk family protein kinase	F	GO:0004674	protein serine/threonine kinase activity
	Bodac2015c130179		snrk sapk family protein kinase	P	GO:0009651	response to salt stress
	Bodac2015c130179		snrk sapk family protein kinase	P	GO:0042742	defense response to bacterium
	Bodac2015c130179		snrk sapk family protein kinase	F	GO:0005524	ATP binding
	Bodac2015c130179		snrk sapk family protein kinase	P	GO:0009738	abscisic acid mediated signaling pathway
	Bodac2015c130179		snrk sapk family protein kinase	C	GO:0005737	cytoplasm
	Bodac2015c130179		snrk sapk family protein kinase	C	GO:0005634	nucleus
	Bodac2015c138737	267	retrotransposon ty1-copia subclass	P	GO:0006952	defense response
	Bodac2015c138737		retrotransposon ty1-copia subclass	F	GO:0043531	ADP binding
	Bodac2015c138737		retrotransposon ty1-copia subclass	F	GO:0003677	DNA binding
	Bodac2015c138737		retrotransposon ty1-copia subclass	F	GO:0005524	ATP binding
	Bodac2015c138737		retrotransposon ty1-copia subclass	F	GO:0008270	zinc ion binding
	Bodac2015c138737		retrotransposon ty1-copia subclass	P	GO:0006915	apoptotic process
	Bodac2015c138737		retrotransposon ty1-copia subclass	P	GO:0015074	DNA integration
	Bodac2015c138737		retrotransposon ty1-copia subclass	P	GO:0006310	DNA recombination
	Bodac2015c145193	344	defence-related protein precursor	P	GO:0009627	systemic acquired resistance
	Bodac2015c145193		defence-related protein precursor	P	GO:0042742	defense response to bacterium
	Bodac2015c145193		defence-related protein precursor	P	GO:0009626	plant-type hypersensitive response
	Bodac2015c145193		defence-related protein precursor	P	GO:0009817	defense response to fungus, incompatible interaction
	Bodac2015c145193		defence-related protein precursor	P	GO:0031640	killing of cells of other organism
	Bodac2015c145193		defence-related protein precursor	P	GO:0009723	response to ethylene stimulus
	Bodac2015c145193		defence-related protein precursor	P	GO:0080027	response to herbivore
	Bodac2015c145193		defence-related protein precursor	P	GO:0009615	response to virus
	Bodac2015c145193		defence-related protein precursor	P	GO:0009651	response to salt stress
	Bodac2015c146262	455	pathogenesis-related maize seed protein	C	GO:0005576	extracellular region
	Bodac2015c146262		pathogenesis-related maize seed protein	C	GO:0016023	cytoplasmic membrane-bounded vesicle
	Bodac2015c146262		pathogenesis-related maize seed protein	P	GO:0006952	defense response
	Bodac2015c146262		pathogenesis-related maize seed protein	P	GO:0009607	response to biotic stimulus
	Bodac2015c146460	1131	map kinase family protein	P	GO:0009697	salicylic acid biosynthetic process
	Bodac2015c146460		map kinase family protein	P	GO:0010120	camalexin biosynthetic process
	Bodac2015c146460		map kinase family protein	P	GO:0009738	abscisic acid mediated signaling pathway
	Bodac2015c146460		map kinase family protein	P	GO:2000038	regulation of stomatal complex development
	Bodac2015c146460		map kinase family protein	P	GO:0048481	ovule development
	Bodac2015c146460		map kinase family protein	P	GO:0010229	inflorescence development
	Bodac2015c146460		map kinase family protein	P	GO:0010363	regulation of plant-type hypersensitive response
	Bodac2015c146460		map kinase family protein	P	GO:0010200	response to chitin
	Bodac2015c146460		map kinase family protein	P	GO:0031348	negative regulation of defense response
	Bodac2015c146460		map kinase family protein	P	GO:0050832	defense response to fungus
	Bodac2015c146460		map kinase family protein	P	GO:0043069	negative regulation of programmed cell death
	Bodac2015c146460		map kinase family protein	P	GO:0009867	jasmonic acid mediated signaling pathway
	Bodac2015c146460		map kinase family protein	P	GO:0019684	photosynthesis, light reaction
	Bodac2015c146460		map kinase family protein	P	GO:0009595	detection of biotic stimulus
	Bodac2015c146460		map kinase family protein	P	GO:0042742	defense response to bacterium
	Bodac2015c146460		map kinase family protein	F	GO:0004707	MAP kinase activity
	Bodac2015c146460		map kinase family protein	P	GO:0006612	protein targeting to membrane
	Bodac2015c146460		map kinase family protein	P	GO:0001666	response to hypoxia
	Bodac2015c146460		map kinase family protein	P	GO:0080136	priming of cellular response to stress
	Bodac2015c146460		map kinase family protein	P	GO:0006979	response to oxidative stress
	Bodac2015c146460		map kinase family protein	P	GO:0010224	response to UV-B
	Bodac2015c146460		map kinase family protein	P	GO:0010310	regulation of hydrogen peroxide metabolic process
	Bodac2015c146460		map kinase family protein	P	GO:2000037	regulation of stomatal complex patterning
	Bodac2015c146460		map kinase family protein	P	GO:0009862	systemic acquired resistance, salicylic acid mediated signaling pathway
	Bodac2015c146460		map kinase family protein	F	GO:0005524	ATP binding
	Bodac2015c146460		map kinase family protein	P	GO:0000169	activation of MAPK activity involved in osmosensory signaling pathway
	Bodac2015c146460		map kinase family protein	P	GO:0035304	regulation of protein dephosphorylation
	Bodac2015c146460		map kinase family protein	P	GO:0009409	response to cold
	Bodac2015c146460		map kinase family protein	P	GO:0043900	regulation of multi-organism process
	Bodac2015c146460		map kinase family protein	P	GO:0009611	response to wounding
	Bodac2015c146460		map kinase family protein	P	GO:0006355	regulation of transcription, DNA-dependent
	Bodac2015c147263	445	leucine-rich repeat receptor-like serine threonine tyrosine-protein kinase sobir1-like	P	GO:0006468	protein phosphorylation
	Bodac2015c147263		leucine-rich repeat receptor-like serine threonine tyrosine-protein kinase sobir1-like	P	GO:0010942	positive regulation of cell death
	Bodac2015c147263		leucine-rich repeat receptor-like serine threonine tyrosine-protein kinase sobir1-like	F	GO:0004674	protein serine/threonine kinase activity
	Bodac2015c147263		leucine-rich repeat receptor-like serine threonine tyrosine-protein kinase sobir1-like	P	GO:0007169	transmembrane receptor protein tyrosine kinase signaling pathway
	Bodac2015c147263		leucine-rich repeat receptor-like serine threonine tyrosine-protein kinase sobir1-like	C	GO:0016023	cytoplasmic membrane-bounded vesicle
	Bodac2015c147263		leucine-rich repeat receptor-like serine threonine tyrosine-protein kinase sobir1-like	F	GO:0004713	protein tyrosine kinase activity
	Bodac2015c147263		leucine-rich repeat receptor-like serine threonine tyrosine-protein kinase sobir1-like	F	GO:0005524	ATP binding
	Bodac2015c147263		leucine-rich repeat receptor-like serine threonine tyrosine-protein kinase sobir1-like	P	GO:0031349	positive regulation of defense response
	Bodac2015c147263		leucine-rich repeat receptor-like serine threonine tyrosine-protein kinase sobir1-like	P	GO:0060862	negative regulation of floral organ abscission
	Bodac2015c147648	693	disease resistance protein rps2-like	F	GO:0017111	nucleoside-triphosphatase activity
	Bodac2015c147648		disease resistance protein rps2-like	P	GO:0006952	defense response
	Bodac2015c147648		disease resistance protein rps2-like	F	GO:0043531	ADP binding
	Bodac2015c147648		disease resistance protein rps2-like	F	GO:0005524	ATP binding
	Bodac2015c148583	1900	upf0183 protein	P	GO:0009627	systemic acquired resistance
	Bodac2015c148583		upf0183 protein	P	GO:0010200	response to chitin
	Bodac2015c148583		upf0183 protein	P	GO:0009610	response to symbiotic fungus
	Bodac2015c148583		upf0183 protein	P	GO:0009697	salicylic acid biosynthetic process
	Bodac2015c148583		upf0183 protein	P	GO:0006914	autophagy
	Bodac2015c149644	1043	glycosyltransferase family protein	C	GO:0005768	endosome
	Bodac2015c149644		glycosyltransferase family protein	P	GO:0045087	innate immune response
	Bodac2015c149644		glycosyltransferase family protein	P	GO:0016337	cell-cell adhesion
	Bodac2015c149644		glycosyltransferase family protein	C	GO:0005794	Golgi apparatus
	Bodac2015c149644		glycosyltransferase family protein	P	GO:0009617	response to bacterium
	Bodac2015c149644		glycosyltransferase family protein	F	GO:0035251	UDP-glucosyltransferase activity
	Bodac2015c149644		glycosyltransferase family protein	P	GO:0010087	phloem or xylem histogenesis
	Bodac2015c149644		glycosyltransferase family protein	C	GO:0031227	intrinsic to endoplasmic reticulum membrane
	Bodac2015c149644		glycosyltransferase family protein	C	GO:0005802	trans-Golgi network
	Bodac2015c149644		glycosyltransferase family protein	C	GO:0005739	mitochondrion
	Bodac2015c151838	1060	uncharacterized amino acid permease -like	P	GO:0010363	regulation of plant-type hypersensitive response
	Bodac2015c151838		uncharacterized amino acid permease -like	P	GO:0015819	lysine transport
	Bodac2015c151838		uncharacterized amino acid permease -like	C	GO:0016021	integral to membrane
	Bodac2015c151838		uncharacterized amino acid permease -like	F	GO:0015189	L-lysine transmembrane transporter activity
	Bodac2015c151838		uncharacterized amino acid permease -like	P	GO:0015696	ammonium transport
	Bodac2015c151838		uncharacterized amino acid permease -like	P	GO:0051938	L-glutamate import
	Bodac2015c151838		uncharacterized amino acid permease -like	P	GO:0003333	amino acid transmembrane transport
	Bodac2015c151838		uncharacterized amino acid permease -like	P	GO:0006862	nucleotide transport
	Bodac2015c151838		uncharacterized amino acid permease -like	F	GO:0015326	cationic amino acid transmembrane transporter activity
	Bodac2015c151838		uncharacterized amino acid permease -like	P	GO:0006612	protein targeting to membrane
	Bodac2015c151838		uncharacterized amino acid permease -like	P	GO:0006944	membrane fusion
	Bodac2015c151838		uncharacterized amino acid permease -like	P	GO:0043069	negative regulation of programmed cell death
	Bodac2015c151838		uncharacterized amino acid permease -like	P	GO:0015824	proline transport
	Bodac2015c151838		uncharacterized amino acid permease -like	P	GO:0006888	ER to Golgi vesicle-mediated transport
	Bodac2015c151838		uncharacterized amino acid permease -like	P	GO:0043091	L-arginine import
	Bodac2015c151838		uncharacterized amino acid permease -like	P	GO:0010583	response to cyclopentenone
	Bodac2015c151838		uncharacterized amino acid permease -like	F	GO:0015181	arginine transmembrane transporter activity
	Bodac2015c151838		uncharacterized amino acid permease -like	F	GO:0005313	L-glutamate transmembrane transporter activity
	Bodac2015c151838		uncharacterized amino acid permease -like	P	GO:0009407	toxin catabolic process
	Bodac2015c151838		uncharacterized amino acid permease -like	P	GO:0043269	regulation of ion transport
	Bodac2015c151838		uncharacterized amino acid permease -like	C	GO:0005886	plasma membrane
	Bodac2015c153759	292	disease resistance rpp13-like protein 1	P	GO:0006952	defense response
	Bodac2015c153759		disease resistance rpp13-like protein 1	F	GO:0043531	ADP binding
	Bodac2015c156202	864	elicitor-responsive protein 1	P	GO:0010363	regulation of plant-type hypersensitive response
	Bodac2015c156202		elicitor-responsive protein 1	P	GO:0009963	positive regulation of flavonoid biosynthetic process
	Bodac2015c156202		elicitor-responsive protein 1	P	GO:0006612	protein targeting to membrane
	Bodac2015c156624	666	disease resistance protein rpm1-like	P	GO:0006952	defense response
	Bodac2015c156624		disease resistance protein rpm1-like	F	GO:0043531	ADP binding
	Bodac2015c156624		disease resistance protein rpm1-like	C	GO:0016023	cytoplasmic membrane-bounded vesicle
	Bodac2015c156624		disease resistance protein rpm1-like	C	GO:0009536	plastid
	Bodac2015c162372	1431	abhydrolase domain-containing protein 4-like	P	GO:0009407	toxin catabolic process
	Bodac2015c162372		abhydrolase domain-containing protein 4-like	P	GO:0010583	response to cyclopentenone
	Bodac2015c162372		abhydrolase domain-containing protein 4-like	F	GO:0004623	phospholipase A2 activity
	Bodac2015c162372		abhydrolase domain-containing protein 4-like	P	GO:0010200	response to chitin
	Bodac2015c162372		abhydrolase domain-containing protein 4-like	P	GO:0052542	defense response by callose deposition
	Bodac2015c162372		abhydrolase domain-containing protein 4-like	F	GO:0042171	lysophosphatidic acid acyltransferase activity
	Bodac2015c162372		abhydrolase domain-containing protein 4-like	P	GO:0070328	triglyceride homeostasis
	Bodac2015c162372		abhydrolase domain-containing protein 4-like	P	GO:0055091	phospholipid homeostasis
	Bodac2015c162372		abhydrolase domain-containing protein 4-like	P	GO:0055089	fatty acid homeostasis
	Bodac2015c162524	775	disease resistance rpp13-like protein 3-like isoform x2	P	GO:0006952	defense response
	Bodac2015c162524		disease resistance rpp13-like protein 3-like isoform x2	F	GO:0043531	ADP binding
	Bodac2015c163751	1805	leucine-rich repeat receptor-like serine threonine tyrosine-protein kinase sobir1-like	P	GO:0006468	protein phosphorylation
	Bodac2015c163751		leucine-rich repeat receptor-like serine threonine tyrosine-protein kinase sobir1-like	P	GO:0010942	positive regulation of cell death
	Bodac2015c163751		leucine-rich repeat receptor-like serine threonine tyrosine-protein kinase sobir1-like	F	GO:0004674	protein serine/threonine kinase activity
	Bodac2015c163751		leucine-rich repeat receptor-like serine threonine tyrosine-protein kinase sobir1-like	P	GO:0007169	transmembrane receptor protein tyrosine kinase signaling pathway
	Bodac2015c163751		leucine-rich repeat receptor-like serine threonine tyrosine-protein kinase sobir1-like	C	GO:0016023	cytoplasmic membrane-bounded vesicle
	Bodac2015c163751		leucine-rich repeat receptor-like serine threonine tyrosine-protein kinase sobir1-like	F	GO:0004713	protein tyrosine kinase activity
	Bodac2015c163751		leucine-rich repeat receptor-like serine threonine tyrosine-protein kinase sobir1-like	F	GO:0005524	ATP binding
	Bodac2015c163751		leucine-rich repeat receptor-like serine threonine tyrosine-protein kinase sobir1-like	P	GO:0031349	positive regulation of defense response
	Bodac2015c163751		leucine-rich repeat receptor-like serine threonine tyrosine-protein kinase sobir1-like	P	GO:0060862	negative regulation of floral organ abscission
	Bodac2015c164184	1588	homeodomain-like transcription factor superfamily protein	P	GO:0010118	stomatal movement
	Bodac2015c164184		homeodomain-like transcription factor superfamily protein	P	GO:0009414	response to water deprivation
	Bodac2015c164184		homeodomain-like transcription factor superfamily protein	C	GO:0005739	mitochondrion
	Bodac2015c164184		homeodomain-like transcription factor superfamily protein	P	GO:0009867	jasmonic acid mediated signaling pathway
	Bodac2015c164184		homeodomain-like transcription factor superfamily protein	P	GO:0006355	regulation of transcription, DNA-dependent
	Bodac2015c164184		homeodomain-like transcription factor superfamily protein	C	GO:0009536	plastid
	Bodac2015c164184		homeodomain-like transcription factor superfamily protein	F	GO:0043565	sequence-specific DNA binding
	Bodac2015c164184		homeodomain-like transcription factor superfamily protein	F	GO:0003700	sequence-specific DNA binding transcription factor activity
	Bodac2015c164184		homeodomain-like transcription factor superfamily protein	P	GO:0050832	defense response to fungus
	Bodac2015c164184		homeodomain-like transcription factor superfamily protein	C	GO:0005634	nucleus
	Bodac2015c164725	2596	map kinase kinase	P	GO:0009611	response to wounding
	Bodac2015c164725		map kinase kinase	P	GO:0009631	cold acclimation
	Bodac2015c164725		map kinase kinase	F	GO:0004708	MAP kinase kinase activity
	Bodac2015c164725		map kinase kinase	P	GO:0042542	response to hydrogen peroxide
	Bodac2015c164725		map kinase kinase	P	GO:0009414	response to water deprivation
	Bodac2015c164725		map kinase kinase	P	GO:0009651	response to salt stress
	Bodac2015c164725		map kinase kinase	P	GO:0042742	defense response to bacterium
	Bodac2015c164725		map kinase kinase	C	GO:0005737	cytoplasm
	Bodac2015c164725		map kinase kinase	F	GO:0004674	protein serine/threonine kinase activity
	Bodac2015c164725		map kinase kinase	P	GO:0009814	defense response, incompatible interaction
	Bodac2015c164725		map kinase kinase	P	GO:0002237	response to molecule of bacterial origin
	Bodac2015c164725		map kinase kinase	C	GO:0005886	plasma membrane
	Bodac2015c164725		map kinase kinase	F	GO:0005524	ATP binding
	Bodac2015c164725		map kinase kinase	P	GO:0000187	activation of MAPK activity
	Bodac2015c165274	2695	disease resistance protein rpm1	P	GO:0006952	defense response
	Bodac2015c165274		disease resistance protein rpm1	F	GO:0043531	ADP binding
	Bodac2015c167998	1680	transcription factor hbp- expressed	P	GO:0006355	regulation of transcription, DNA-dependent
	Bodac2015c167998		transcription factor hbp- expressed	P	GO:0009627	systemic acquired resistance
	Bodac2015c167998		transcription factor hbp- expressed	F	GO:0043565	sequence-specific DNA binding
	Bodac2015c167998		transcription factor hbp- expressed	P	GO:0009410	response to xenobiotic stimulus
	Bodac2015c167998		transcription factor hbp- expressed	P	GO:0009863	salicylic acid mediated signaling pathway
	Bodac2015c167998		transcription factor hbp- expressed	F	GO:0003700	sequence-specific DNA binding transcription factor activity
	Bodac2015c167998		transcription factor hbp- expressed	C	GO:0005737	cytoplasm
	Bodac2015c167998		transcription factor hbp- expressed	C	GO:0005634	nucleus
	Bodac2015c168040	2374	peptide transporter ptr3-a-like	P	GO:0042538	hyperosmotic salinity response
	Bodac2015c168040		peptide transporter ptr3-a-like	P	GO:0042742	defense response to bacterium
	Bodac2015c168040		peptide transporter ptr3-a-like	P	GO:0080052	response to histidine
	Bodac2015c168040		peptide transporter ptr3-a-like	P	GO:0009624	response to nematode
	Bodac2015c168040		peptide transporter ptr3-a-like	P	GO:0042939	tripeptide transport
	Bodac2015c168040		peptide transporter ptr3-a-like	P	GO:0009753	response to jasmonic acid stimulus
	Bodac2015c168040		peptide transporter ptr3-a-like	F	GO:0042936	dipeptide transporter activity
	Bodac2015c168040		peptide transporter ptr3-a-like	P	GO:0043201	response to leucine
	Bodac2015c168040		peptide transporter ptr3-a-like	P	GO:0009611	response to wounding
	Bodac2015c168040		peptide transporter ptr3-a-like	P	GO:0009751	response to salicylic acid stimulus
	Bodac2015c168040		peptide transporter ptr3-a-like	P	GO:0009737	response to abscisic acid stimulus
	Bodac2015c168040		peptide transporter ptr3-a-like	F	GO:0042937	tripeptide transporter activity
	Bodac2015c168040		peptide transporter ptr3-a-like	C	GO:0016020	membrane
	Bodac2015c168040		peptide transporter ptr3-a-like	P	GO:0080053	response to phenylalanine
	Bodac2015c168040		peptide transporter ptr3-a-like	P	GO:0042938	dipeptide transport
	Bodac2015c169500	2284	bzip transcription factor	P	GO:0006355	regulation of transcription, DNA-dependent
	Bodac2015c169500		bzip transcription factor	P	GO:0009627	systemic acquired resistance
	Bodac2015c169500		bzip transcription factor	F	GO:0043565	sequence-specific DNA binding
	Bodac2015c169500		bzip transcription factor	P	GO:0009410	response to xenobiotic stimulus
	Bodac2015c169500		bzip transcription factor	P	GO:0009863	salicylic acid mediated signaling pathway
	Bodac2015c169500		bzip transcription factor	F	GO:0003700	sequence-specific DNA binding transcription factor activity
	Bodac2015c169500		bzip transcription factor	C	GO:0005737	cytoplasm
	Bodac2015c169500		bzip transcription factor	C	GO:0005634	nucleus
	Bodac2015c172518	1945	protein transparent testa glabra 1-like	P	GO:0010026	trichome differentiation
	Bodac2015c172518		protein transparent testa glabra 1-like	P	GO:0010363	regulation of plant-type hypersensitive response
	Bodac2015c172518		protein transparent testa glabra 1-like	P	GO:0009957	epidermal cell fate specification
	Bodac2015c172518		protein transparent testa glabra 1-like	P	GO:0032880	regulation of protein localization
	Bodac2015c172518		protein transparent testa glabra 1-like	P	GO:0009963	positive regulation of flavonoid biosynthetic process
	Bodac2015c172518		protein transparent testa glabra 1-like	F	GO:0003677	DNA binding
	Bodac2015c172518		protein transparent testa glabra 1-like	P	GO:0006612	protein targeting to membrane
	Bodac2015c172518		protein transparent testa glabra 1-like	F	GO:0000166	nucleotide binding
	Bodac2015c172518		protein transparent testa glabra 1-like	C	GO:0005737	cytoplasm
	Bodac2015c172518		protein transparent testa glabra 1-like	C	GO:0005634	nucleus
	Bodac2015c173459	3386	disease resistance rpp13-like protein 2-like	P	GO:0006952	defense response
	Bodac2015c173459		disease resistance rpp13-like protein 2-like	F	GO:0043531	ADP binding
	Bodac2015c176239	253	nb-arc domain containing expressed	P	GO:0006952	defense response
	Bodac2015c176239		nb-arc domain containing expressed	F	GO:0043531	ADP binding
	Bodac2015c176239		nb-arc domain containing expressed	F	GO:0005524	ATP binding
	Bodac2015c176239		nb-arc domain containing expressed	P	GO:0006915	apoptotic process
	Bodac2015c183013	277	ddb1- and cul4-associated factor 8-like	P	GO:0009862	systemic acquired resistance, salicylic acid mediated signaling pathway
	Bodac2015c183013		ddb1- and cul4-associated factor 8-like	C	GO:0080008	Cul4-RING ubiquitin ligase complex
	Bodac2015c183013		ddb1- and cul4-associated factor 8-like	F	GO:0000166	nucleotide binding
	Bodac2015c183636	29	protein kinase receptor type precursor	P	GO:0050776	regulation of immune response
	Bodac2015c183636		protein kinase receptor type precursor	P	GO:0006468	protein phosphorylation
	Bodac2015c183636		protein kinase receptor type precursor	F	GO:0004674	protein serine/threonine kinase activity
	Bodac2015c183636		protein kinase receptor type precursor	P	GO:0045087	innate immune response
	Bodac2015c183636		protein kinase receptor type precursor	P	GO:0009617	response to bacterium
	Bodac2015c183636		protein kinase receptor type precursor	P	GO:0044765	single-organism transport
	Bodac2015c183636		protein kinase receptor type precursor	C	GO:0016023	cytoplasmic membrane-bounded vesicle
	Bodac2015c183636		protein kinase receptor type precursor	F	GO:0005524	ATP binding
	Bodac2015c183636		protein kinase receptor type precursor	P	GO:0007165	signal transduction
	Bodac2015c183636		protein kinase receptor type precursor	C	GO:0016020	membrane
	Bodac2015c186010	351	disease resistance protein rpm1	P	GO:0006952	defense response
	Bodac2015c186010		disease resistance protein rpm1	F	GO:0043531	ADP binding
	Bodac2015c186010		disease resistance protein rpm1	C	GO:0016023	cytoplasmic membrane-bounded vesicle
	Bodac2015c186010		disease resistance protein rpm1	C	GO:0009536	plastid
	Bodac2015c093897	275	nitrate reductase	P	GO:0055114	oxidation-reduction process
	Bodac2015c093897		nitrate reductase	F	GO:0050463	nitrate reductase [NAD(P)H] activity
	Bodac2015c093897		nitrate reductase	P	GO:0009416	response to light stimulus
	Bodac2015c093897		nitrate reductase	P	GO:0009610	response to symbiotic fungus
	Bodac2015c093897		nitrate reductase	F	GO:0009703	nitrate reductase (NADH) activity
	Bodac2015c093897		nitrate reductase	F	GO:0009055	electron carrier activity
	Bodac2015c093897		nitrate reductase	F	GO:0043546	molybdopterin cofactor binding
	Bodac2015c093897		nitrate reductase	P	GO:0042128	nitrate assimilation
	Bodac2015c093897		nitrate reductase	F	GO:0050660	flavin adenine dinucleotide binding
	Bodac2015c093897		nitrate reductase	F	GO:0020037	heme binding
	Bodac2015c093897		nitrate reductase	C	GO:0005773	vacuole
	Bodac2015c093897		nitrate reductase	P	GO:0006809	nitric oxide biosynthetic process
	Bodac2015c093897		nitrate reductase	F	GO:0005506	iron ion binding
	Bodac2015c093897		nitrate reductase	C	GO:0005886	plasma membrane
	Bodac2015c093897		nitrate reductase	F	GO:0030151	molybdenum ion binding
	Bodac2015c137781	2839	cyclic nucleotide-gated ion channel 1-like isoform x1	P	GO:0006816	calcium ion transport
	Bodac2015c137781		cyclic nucleotide-gated ion channel 1-like isoform x1	C	GO:0005886	plasma membrane
	Bodac2015c137781		cyclic nucleotide-gated ion channel 1-like isoform x1	P	GO:0055085	transmembrane transport
	Bodac2015c137781		cyclic nucleotide-gated ion channel 1-like isoform x1	F	GO:0005242	inward rectifier potassium channel activity
	Bodac2015c137781		cyclic nucleotide-gated ion channel 1-like isoform x1	P	GO:0006813	potassium ion transport
	Bodac2015c137781		cyclic nucleotide-gated ion channel 1-like isoform x1	C	GO:0016021	integral to membrane
	Bodac2015c137781		cyclic nucleotide-gated ion channel 1-like isoform x1	F	GO:0005221	intracellular cyclic nucleotide activated cation channel activity
	Bodac2015c137781		cyclic nucleotide-gated ion channel 1-like isoform x1	P	GO:0009620	response to fungus
	Bodac2015c143443	813	iron-phytosiderophore transporter yellow stripe 1-like	P	GO:0009624	response to nematode
	Bodac2015c143443		iron-phytosiderophore transporter yellow stripe 1-like	C	GO:0005886	plasma membrane
	Bodac2015c143443		iron-phytosiderophore transporter yellow stripe 1-like	P	GO:0055072	iron ion homeostasis
	Bodac2015c143443		iron-phytosiderophore transporter yellow stripe 1-like	P	GO:0010043	response to zinc ion
	Bodac2015c143443		iron-phytosiderophore transporter yellow stripe 1-like	F	GO:0051980	iron-nicotianamine transmembrane transporter activity
	Bodac2015c143443		iron-phytosiderophore transporter yellow stripe 1-like	P	GO:0055085	transmembrane transport
	Bodac2015c143443		iron-phytosiderophore transporter yellow stripe 1-like	P	GO:0006811	ion transport
	Bodac2015c143443		iron-phytosiderophore transporter yellow stripe 1-like	P	GO:0010039	response to iron ion
	Bodac2015c143443		iron-phytosiderophore transporter yellow stripe 1-like	C	GO:0016021	integral to membrane
	Bodac2015c143443		iron-phytosiderophore transporter yellow stripe 1-like	P	GO:0048316	seed development
	Bodac2015c152668	1178	4-coumarate-- ligase-like 3-like	P	GO:0009610	response to symbiotic fungus
	Bodac2015c152668		4-coumarate-- ligase-like 3-like	F	GO:0005524	ATP binding
	Bodac2015c152668		4-coumarate-- ligase-like 3-like	F	GO:0016207	4-coumarate-CoA ligase activity
	Bodac2015c152668		4-coumarate-- ligase-like 3-like	P	GO:0006914	autophagy
	Bodac2015c156838	756	nitrate reductase	P	GO:0055114	oxidation-reduction process
	Bodac2015c156838		nitrate reductase	P	GO:0009416	response to light stimulus
	Bodac2015c156838		nitrate reductase	P	GO:0009610	response to symbiotic fungus
	Bodac2015c156838		nitrate reductase	F	GO:0009703	nitrate reductase (NADH) activity
	Bodac2015c156838		nitrate reductase	F	GO:0009055	electron carrier activity
	Bodac2015c156838		nitrate reductase	F	GO:0043546	molybdopterin cofactor binding
	Bodac2015c156838		nitrate reductase	P	GO:0042128	nitrate assimilation
	Bodac2015c156838		nitrate reductase	F	GO:0050660	flavin adenine dinucleotide binding
	Bodac2015c156838		nitrate reductase	F	GO:0020037	heme binding
	Bodac2015c156838		nitrate reductase	C	GO:0005773	vacuole
	Bodac2015c156838		nitrate reductase	P	GO:0006809	nitric oxide biosynthetic process
	Bodac2015c156838		nitrate reductase	F	GO:0005506	iron ion binding
	Bodac2015c156838		nitrate reductase	C	GO:0005886	plasma membrane
	Bodac2015c156838		nitrate reductase	F	GO:0030151	molybdenum ion binding
	Bodac2015c157436	1201	anthranilate synthase component ii-like	P	GO:0009851	auxin biosynthetic process
	Bodac2015c157436		anthranilate synthase component ii-like	P	GO:0009617	response to bacterium
	Bodac2015c157436		anthranilate synthase component ii-like	C	GO:0009507	chloroplast
	Bodac2015c157436		anthranilate synthase component ii-like	P	GO:0009723	response to ethylene stimulus
	Bodac2015c157436		anthranilate synthase component ii-like	P	GO:0009651	response to salt stress
	Bodac2015c158386	2106	probable leucine-rich repeat receptor-like serine threonine-protein kinase at3g14840-like	P	GO:0006468	protein phosphorylation
	Bodac2015c158386		probable leucine-rich repeat receptor-like serine threonine-protein kinase at3g14840-like	F	GO:0004674	protein serine/threonine kinase activity
	Bodac2015c158386		probable leucine-rich repeat receptor-like serine threonine-protein kinase at3g14840-like	C	GO:0009536	plastid
	Bodac2015c158386		probable leucine-rich repeat receptor-like serine threonine-protein kinase at3g14840-like	P	GO:0009595	detection of biotic stimulus
	Bodac2015c158386		probable leucine-rich repeat receptor-like serine threonine-protein kinase at3g14840-like	F	GO:0005524	ATP binding
	Bodac2015c158386		probable leucine-rich repeat receptor-like serine threonine-protein kinase at3g14840-like	P	GO:0010200	response to chitin
	Bodac2015c158386		probable leucine-rich repeat receptor-like serine threonine-protein kinase at3g14840-like	P	GO:0002237	response to molecule of bacterial origin
	Bodac2015c158386		probable leucine-rich repeat receptor-like serine threonine-protein kinase at3g14840-like	P	GO:0009581	detection of external stimulus
	Bodac2015c159696	2812	nitrate reductase apoenzyme	P	GO:0022900	electron transport chain
	Bodac2015c159696		nitrate reductase apoenzyme	P	GO:0009416	response to light stimulus
	Bodac2015c159696		nitrate reductase apoenzyme	P	GO:0009610	response to symbiotic fungus
	Bodac2015c159696		nitrate reductase apoenzyme	F	GO:0009703	nitrate reductase (NADH) activity
	Bodac2015c159696		nitrate reductase apoenzyme	F	GO:0009055	electron carrier activity
	Bodac2015c159696		nitrate reductase apoenzyme	F	GO:0043546	molybdopterin cofactor binding
	Bodac2015c159696		nitrate reductase apoenzyme	P	GO:0042128	nitrate assimilation
	Bodac2015c159696		nitrate reductase apoenzyme	F	GO:0050660	flavin adenine dinucleotide binding
	Bodac2015c159696		nitrate reductase apoenzyme	F	GO:0020037	heme binding
	Bodac2015c159696		nitrate reductase apoenzyme	C	GO:0005773	vacuole
	Bodac2015c159696		nitrate reductase apoenzyme	P	GO:0006809	nitric oxide biosynthetic process
	Bodac2015c159696		nitrate reductase apoenzyme	F	GO:0005506	iron ion binding
	Bodac2015c159696		nitrate reductase apoenzyme	C	GO:0005886	plasma membrane
	Bodac2015c159696		nitrate reductase apoenzyme	F	GO:0030151	molybdenum ion binding
	Bodac2015c159875	2958	monosaccharide-sensing protein 2-like	F	GO:0022891	substrate-specific transmembrane transporter activity
	Bodac2015c159875		monosaccharide-sensing protein 2-like	P	GO:0009624	response to nematode
	Bodac2015c159875		monosaccharide-sensing protein 2-like	C	GO:0009705	plant-type vacuole membrane
	Bodac2015c159875		monosaccharide-sensing protein 2-like	C	GO:0005886	plasma membrane
	Bodac2015c159875		monosaccharide-sensing protein 2-like	P	GO:0055085	transmembrane transport
	Bodac2015c159875		monosaccharide-sensing protein 2-like	P	GO:0008643	carbohydrate transport
	Bodac2015c159875		monosaccharide-sensing protein 2-like	C	GO:0016021	integral to membrane
	Bodac2015c162426	1953	mate efflux family protein 5-like	P	GO:0006855	drug transmembrane transport
	Bodac2015c162426		mate efflux family protein 5-like	F	GO:0015297	antiporter activity
	Bodac2015c162426		mate efflux family protein 5-like	P	GO:0009624	response to nematode
	Bodac2015c162426		mate efflux family protein 5-like	F	GO:0015238	drug transmembrane transporter activity
	Bodac2015c162426		mate efflux family protein 5-like	C	GO:0005886	plasma membrane
	Bodac2015c177606	271	1-aminocyclopropane-1-carboxylate oxidase	P	GO:0009727	detection of ethylene stimulus
	Bodac2015c177606		1-aminocyclopropane-1-carboxylate oxidase	P	GO:0009693	ethylene biosynthetic process
	Bodac2015c177606		1-aminocyclopropane-1-carboxylate oxidase	F	GO:0005507	copper ion binding
	Bodac2015c177606		1-aminocyclopropane-1-carboxylate oxidase	C	GO:0005886	plasma membrane
	Bodac2015c177606		1-aminocyclopropane-1-carboxylate oxidase	C	GO:0005618	cell wall
	Bodac2015c177606		1-aminocyclopropane-1-carboxylate oxidase	F	GO:0016706	oxidoreductase activity, acting on paired donors, with incorporation or reduction of molecular oxygen, 2-oxoglutarate as one donor, and incorporation of one atom each of oxygen into both donors
	Bodac2015c177606		1-aminocyclopropane-1-carboxylate oxidase	P	GO:0009651	response to salt stress
	Bodac2015c177606		1-aminocyclopropane-1-carboxylate oxidase	P	GO:0055114	oxidation-reduction process
	Bodac2015c177606		1-aminocyclopropane-1-carboxylate oxidase	P	GO:0009620	response to fungus
	Bodac2015c178550	1140	sugar transport protein 1-like	P	GO:0009624	response to nematode
	Bodac2015c178550		sugar transport protein 1-like	C	GO:0005773	vacuole
	Bodac2015c178550		sugar transport protein 1-like	P	GO:0015749	monosaccharide transport
	Bodac2015c178550		sugar transport protein 1-like	C	GO:0005886	plasma membrane
	Bodac2015c178550		sugar transport protein 1-like	F	GO:0015145	monosaccharide transmembrane transporter activity
	Bodac2015c178550		sugar transport protein 1-like	P	GO:0055085	transmembrane transport
	Bodac2015c178550		sugar transport protein 1-like	F	GO:0008506	sucrose:hydrogen symporter activity
	Bodac2015c178550		sugar transport protein 1-like	C	GO:0016021	integral to membrane
	Bodac2015c178550		sugar transport protein 1-like	C	GO:0005634	nucleus
	Bodac2015c129668	259	autophagy-related protein 8c-like	C	GO:0000421	autophagic vacuole membrane
	Bodac2015c129668		autophagy-related protein 8c-like	C	GO:0005874	microtubule
	Bodac2015c129668		autophagy-related protein 8c-like	C	GO:0033110	Cvt vesicle membrane
	Bodac2015c129668		autophagy-related protein 8c-like	P	GO:0006914	autophagy
	Bodac2015c129668		autophagy-related protein 8c-like	P	GO:0015031	protein transport
	Bodac2015c129668		autophagy-related protein 8c-like	P	GO:0050832	defense response to fungus
	Bodac2015c130123	1218	low quality protein: protein lsd1-like	C	GO:0005634	nucleus
	Bodac2015c130123		low quality protein: protein lsd1-like	P	GO:0009626	plant-type hypersensitive response
	Bodac2015c130123		low quality protein: protein lsd1-like	P	GO:0030154	cell differentiation
	Bodac2015c130123		low quality protein: protein lsd1-like	P	GO:0034051	negative regulation of plant-type hypersensitive response
	Bodac2015c130123		low quality protein: protein lsd1-like	P	GO:0045595	regulation of cell differentiation
	Bodac2015c134036	523	barley mlo defense gene homolog2	C	GO:0005737	cytoplasm
	Bodac2015c134036		barley mlo defense gene homolog2	C	GO:0005886	plasma membrane
	Bodac2015c134036		barley mlo defense gene homolog2	C	GO:0012505	endomembrane system
	Bodac2015c134036		barley mlo defense gene homolog2	C	GO:0016021	integral to membrane
	Bodac2015c134036		barley mlo defense gene homolog2	F	GO:0005516	calmodulin binding
	Bodac2015c134036		barley mlo defense gene homolog2	P	GO:0006952	defense response
	Bodac2015c134036		barley mlo defense gene homolog2	P	GO:0009607	response to biotic stimulus
	Bodac2015c134036		barley mlo defense gene homolog2	P	GO:0010483	pollen tube reception
	Bodac2015c135157	838	transposon unclassified	F	GO:0003677	DNA binding
	Bodac2015c135157		transposon unclassified	F	GO:0005524	ATP binding
	Bodac2015c135157		transposon unclassified	F	GO:0008270	zinc ion binding
	Bodac2015c135157		transposon unclassified	F	GO:0043531	ADP binding
	Bodac2015c135157		transposon unclassified	P	GO:0006310	DNA recombination
	Bodac2015c135157		transposon unclassified	P	GO:0006915	apoptotic process
	Bodac2015c135157		transposon unclassified	P	GO:0006952	defense response
	Bodac2015c135157		transposon unclassified	P	GO:0015074	DNA integration
	Bodac2015c160003	2030	fatty acid amide hydrolase-like	C	GO:0005774	vacuolar membrane
	Bodac2015c160003		fatty acid amide hydrolase-like	C	GO:0005794	Golgi apparatus
	Bodac2015c160003		fatty acid amide hydrolase-like	F	GO:0016740	transferase activity
	Bodac2015c160003		fatty acid amide hydrolase-like	F	GO:0016884	carbon-nitrogen ligase activity, with glutamine as amido-N-donor
	Bodac2015c160003		fatty acid amide hydrolase-like	F	GO:0047412	N-(long-chain-acyl)ethanolamine deacylase activity
	Bodac2015c160003		fatty acid amide hydrolase-like	P	GO:0042742	defense response to bacterium
	Bodac2015c160003		fatty acid amide hydrolase-like	P	GO:0070291	N-acylethanolamine metabolic process
	Bodac2015c163936	989	salicylate o-methyltransferase-like	F	GO:0008757	S-adenosylmethionine-dependent methyltransferase activity
	Bodac2015c163936		salicylate o-methyltransferase-like	F	GO:0052624	2-phytyl-1,4-naphthoquinone methyltransferase activity
	Bodac2015c163936		salicylate o-methyltransferase-like	F	GO:0080150	S-adenosyl-L-methionine:benzoic acid carboxyl methyl transferase activity
	Bodac2015c163936		salicylate o-methyltransferase-like	P	GO:0009611	response to wounding
	Bodac2015c163936		salicylate o-methyltransferase-like	P	GO:0032259	methylation
	Bodac2015c163936		salicylate o-methyltransferase-like	P	GO:0051707	response to other organism
	Bodac2015c172670	2979	probable linoleate 9s-lipoxygenase 4-like	C	GO:0009507	chloroplast
	Bodac2015c172670		probable linoleate 9s-lipoxygenase 4-like	F	GO:0005506	iron ion binding
	Bodac2015c172670		probable linoleate 9s-lipoxygenase 4-like	F	GO:0016165	linoleate 13S-lipoxygenase activity
	Bodac2015c172670		probable linoleate 9s-lipoxygenase 4-like	F	GO:1990136	linoleate 9S-lipoxygenase activity
	Bodac2015c172670		probable linoleate 9s-lipoxygenase 4-like	P	GO:0010311	lateral root formation
	Bodac2015c172670		probable linoleate 9s-lipoxygenase 4-like	P	GO:0031408	oxylipin biosynthetic process
	Bodac2015c172670		probable linoleate 9s-lipoxygenase 4-like	P	GO:0034440	lipid oxidation
	Bodac2015c172670		probable linoleate 9s-lipoxygenase 4-like	P	GO:1900366	negative regulation of defense response to insect
	Bodac2015c174152	851	ribulose bisphosphate carboxylase oxygenase activase chloroplastic-like	C	GO:0005618	cell wall
	Bodac2015c174152		ribulose bisphosphate carboxylase oxygenase activase chloroplastic-like	C	GO:0005634	nucleus
	Bodac2015c174152		ribulose bisphosphate carboxylase oxygenase activase chloroplastic-like	C	GO:0009535	chloroplast thylakoid membrane
	Bodac2015c174152		ribulose bisphosphate carboxylase oxygenase activase chloroplastic-like	C	GO:0009570	chloroplast stroma
	Bodac2015c174152		ribulose bisphosphate carboxylase oxygenase activase chloroplastic-like	C	GO:0009941	chloroplast envelope
	Bodac2015c174152		ribulose bisphosphate carboxylase oxygenase activase chloroplastic-like	C	GO:0010319	stromule
	Bodac2015c174152		ribulose bisphosphate carboxylase oxygenase activase chloroplastic-like	C	GO:0048046	apoplast
	Bodac2015c174152		ribulose bisphosphate carboxylase oxygenase activase chloroplastic-like	F	GO:0003700	sequence-specific DNA binding transcription factor activity
	Bodac2015c174152		ribulose bisphosphate carboxylase oxygenase activase chloroplastic-like	F	GO:0005524	ATP binding
	Bodac2015c174152		ribulose bisphosphate carboxylase oxygenase activase chloroplastic-like	F	GO:0043531	ADP binding
	Bodac2015c174152		ribulose bisphosphate carboxylase oxygenase activase chloroplastic-like	F	GO:0046863	ribulose-1,5-bisphosphate carboxylase/oxygenase activator activity
	Bodac2015c174152		ribulose bisphosphate carboxylase oxygenase activase chloroplastic-like	P	GO:0009409	response to cold
	Bodac2015c174152		ribulose bisphosphate carboxylase oxygenase activase chloroplastic-like	P	GO:0009416	response to light stimulus
	Bodac2015c174152		ribulose bisphosphate carboxylase oxygenase activase chloroplastic-like	P	GO:0009753	response to jasmonic acid stimulus
	Bodac2015c174152		ribulose bisphosphate carboxylase oxygenase activase chloroplastic-like	P	GO:0010150	leaf senescence
	Bodac2015c174152		ribulose bisphosphate carboxylase oxygenase activase chloroplastic-like	P	GO:0042742	defense response to bacterium
	Bodac2015c174152		ribulose bisphosphate carboxylase oxygenase activase chloroplastic-like	P	GO:0043085	positive regulation of catalytic activity
	Bodac2015c137369	799	lichenase-2 precursor	C	GO:0005618	cell wall
	Bodac2015c137369		lichenase-2 precursor	C	GO:0048046	apoplast
	Bodac2015c137369		lichenase-2 precursor	F	GO:0042972	licheninase activity
	Bodac2015c137369		lichenase-2 precursor	P	GO:0005975	carbohydrate metabolic process
	Bodac2015c137369		lichenase-2 precursor	P	GO:0009617	response to bacterium
